# Effect of Ventilatory Settings on Accuracy of Cardiac Output Measurement Using Partial CO<sub>2</sub> Rebreathing

Kazuya Tachibana, M.D.,\* Hideaki Imanaka, M.D.,\* Hiroshi Miyano, M.D.,\* Muneyuki Takeuchi, M.D.,\* Keiji Kumon, M.D.,† Masaji Nishimura, M.D.‡

**Background:** Recently, a new device has been developed to measure cardiac output noninvasively using partial carbon dioxide (CO<sub>2</sub>) rebreathing. Because this technique uses CO<sub>2</sub> rebreathing, the authors suspected that ventilatory settings, such as tidal volume and ventilatory mode, would affect its accuracy; they conducted this study to investigate which parameters affect the accuracy of the measurement.

**Methods:** The authors enrolled 25 pharmacologically paralyzed adult post-cardiac surgery patients. They applied six ventilatory settings in random order: (1) volume-controlled ventilation with inspired tidal volume (V<sub>T</sub>) of 12 ml/kg; (2) volume-controlled ventilation with V<sub>T</sub> of 6 ml/kg; (3) pressure-controlled ventilation with V<sub>T</sub> of 12 ml/kg; (4) pressure-controlled ventilation with V<sub>T</sub> of 6 ml/kg; (5) inspired oxygen fraction of 1.0; and (6) high positive end-expiratory pressure. Then, they changed the maximum or minimum length of rebreathing loop with V<sub>T</sub> set at 12 ml/kg. After establishing steady-state conditions (15 min), they measured cardiac output using CO<sub>2</sub> rebreathing and thermodilution *via* a pulmonary artery catheter. Finally, they repeated the measurements during pressure support ventilation, when the patients had restored spontaneous breathing. The correlation between two methods was evaluated with linear regression and Bland-Altman analysis.

**Results:** When V<sub>T</sub> was set at 12 ml/kg, cardiac output with the CO<sub>2</sub> rebreathing technique correlated moderately with that measured by thermodilution ( $y = 1.02x$ ,  $R = 0.63$ ; bias, 0.28 l/min; limits of agreement, -1.78 to +2.34 l/min), regardless of ventilatory mode, oxygen concentration, or positive end-expiratory pressure. However, at a lower V<sub>T</sub> of 6 ml/kg, the CO<sub>2</sub> rebreathing technique underestimated cardiac output compared with thermodilution ( $y = 0.70x$ ;  $R = 0.70$ ; bias, -1.66 l/min; limits of agreement, -3.90 to +0.58 l/min). When the loop was fully retracted, the CO<sub>2</sub> rebreathing technique overestimated cardiac output.

**Conclusions:** Although cardiac output was underreported at small V<sub>T</sub> values, cardiac output measured by the CO<sub>2</sub> rebreathing technique correlates fairly with that measured by the thermodilution method.

ALTHOUGH there is controversy over the cost benefit of pulmonary artery catheterization,<sup>1,2</sup> cardiac output (CO) is commonly monitored when treating critically ill patients. Recently, a new device, the NICO<sub>2</sub> system (Novamatrix Medical Systems Inc., Wallingford, CT), has been developed to measure CO noninvasively using partial carbon dioxide (CO<sub>2</sub>) rebreathing.<sup>3,4</sup> This device

uses periodic partial CO<sub>2</sub> rebreathing to create a CO<sub>2</sub> disturbance, which is then used in a differential Fick CO<sub>2</sub> equation to calculate CO.<sup>3</sup>

There have been few studies to investigate how well the results obtained by CO<sub>2</sub> rebreathing correlate with those obtained by the conventional thermodilution technique.<sup>5–7</sup> Furthermore, it remains to be clarified which ventilatory or hemodynamic parameters affect the measured values when the CO<sub>2</sub> rebreathing technique is used. Because noninvasive CO measurement depends on CO<sub>2</sub> rebreathing and assumes constant dead space and mixed venous CO<sub>2</sub> content through the CO<sub>2</sub> rebreathing procedure,<sup>3,4</sup> we suspected that change in ventilatory settings might affect accuracy of the CO measurement. Consequently, we performed a prospective comparative study to evaluate the effects of tidal volume (V<sub>T</sub>), ventilatory mode, inspired oxygen fraction (F<sub>IO<sub>2</sub></sub>), and positive end-expiratory pressure (PEEP) on the accuracy of the measurement. The NICO<sub>2</sub> system uses a rebreathing loop in which volume is adjustable according to tidal volume. We suspected that a too-short loop may affect the accuracy due to poor signal-to-noise ratio. Therefore, we investigated, as a factor of the machine itself, the effect of adjusting the length of the rebreathing loop.

## Subjects and Methods

The study was approved by the institutional ethics committee of the National Cardiovascular Center (Osaka, Japan), and written informed consent was obtained from each patient.

### Patients

Twenty-five adult patients aged 48–78 yr (median, 61 yr) who had undergone cardiac surgery (table 1) were enrolled in this study. Enrollment criteria were (1) insertion of a Swan-Ganz catheter; (2) stable hemodynamics in the intensive care unit; and (3) no leakage around the endotracheal tube. We excluded candidates who (1) had central nervous system disorders; (2) might be adversely affected by induced hypercapnia (risk of severe pulmonary hypertension or increased intracranial pressure); or (3) demonstrated severe tricuspid regurgitation on intraoperative examination of transesophageal echocardiography, which interferes with the accuracy of thermodilution CO measurement. Arterial blood pressure, heart rate, pulmonary artery pressure, central venous pressure, and pulse oximeter signal (PM-1000; Nellcor Inc., Hayward, CA) were continuously monitored in all pa-

\* Staff Physician, Surgical Intensive Care Unit, † Director, Surgical Intensive Care Unit, National Cardiovascular Center. ‡ Associate Professor, Intensive Care Unit, Osaka University Hospital, Osaka, Japan.

Received from the Surgical Intensive Care Unit, National Cardiovascular Center, Osaka, Japan. Submitted for publication March 30, 2001. Accepted for publication September 7, 2001. Support was provided solely from departmental sources.

Address reprint requests to Dr. Imanaka: Surgical Intensive Care Unit, National Cardiovascular Center, 5-7-1 Fujishiro-dai, Suita, Osaka, Japan 565-8565. Address electronic mail to: imanakah@hsp.ncvc.go.jp. Individual article reprints may be purchased through the Journal Web site, www.anesthesiology.org.

**Table 1. Patient Profile**

|                                        |         |
|----------------------------------------|---------|
| No. of patients                        | 25      |
| M/F                                    | 19/6    |
| Age (yr)                               | 61 ± 9  |
| Height (cm)                            | 163 ± 7 |
| Body Weight (kg)                       | 63 ± 11 |
| Background diseases                    |         |
| Coronary artery disease                | 11      |
| Acquired valve disease                 | 8       |
| Thoracic aortic aneurysm or dissection | 4       |
| Miscellaneous                          | 2       |

tients. After waiting 1–3 h for hemodynamics to stabilize after surgery, we started the measurements.

### Measurements

We measured CO using two methods. Values for CO derived from a thermodilution technique (CO<sub>TD</sub>) were obtained using a Swan-Ganz catheter (7.5 French; Abbott Laboratories, North Chicago, IL). Injection of 10 ml cold saline (0°C) was performed in triplicate, and the values were averaged. Because the CO measurement varies depending on when in the respiratory cycle the measurement is initiated,<sup>8</sup> we standardized the timing of bolus injection after the first half of the expiratory phase. We confirmed the injection timing by watching the waveform of airway pressure *versus* time on the graphic monitor of a ventilator (Bird Corp., Palm Springs, CA). Noninvasive measurement of CO (CO<sub>NI</sub>) was performed with a NICO<sub>2</sub> system (software version 3.1, fast mode). This procedure has been presented in detail elsewhere.<sup>3,4</sup> Briefly, on a breath-by-breath basis, CO<sub>2</sub> production ( $\dot{V}_{CO_2}$ ) is calculated from the flow and CO<sub>2</sub> concentration at the airway opening. Then, to establish the relation between  $\dot{V}_{CO_2}$  and CO, the Fick principle is applied as follows:

$$\dot{V}_{CO_2} = CO \times (C\bar{V}_{CO_2} - C_{aCO_2}), \quad (1)$$

where  $C\bar{V}_{CO_2}$  and  $C_{aCO_2}$  represent the CO<sub>2</sub> content in mixed venous and arterial blood, respectively. In the NICO<sub>2</sub> system, CO<sub>2</sub> rebreathing is performed for 50 s every 3 min using a disposable sensor (Novamatrix Medical Systems). A brief period of CO<sub>2</sub> rebreathing caused a change in  $P_{aCO_2}$  and a change in  $\dot{V}_{CO_2}$  but little or no change in  $C\bar{V}_{CO_2}$  in anesthetized dogs,<sup>3</sup> probably because the quantity of CO<sub>2</sub> stores in the body is large, and new equilibrium levels are attained after 20–30 min.<sup>9</sup> Assuming that CO and  $C\bar{V}_{CO_2}$  remain constant during the CO<sub>2</sub> rebreathing procedure, the following equation can be substituted for the previous one:

$$\Delta \dot{V}_{CO_2} = CO \times (-\Delta C_{aCO_2}), \quad (2)$$

where  $\Delta \dot{V}_{CO_2}$  is the change in  $\dot{V}_{CO_2}$  between normal breathing and CO<sub>2</sub> rebreathing, and  $\Delta C_{aCO_2}$  is the change in arterial CO<sub>2</sub> content. Assuming here that dead space fraction ( $V_D/V_T$ ) remains constant during the CO<sub>2</sub>

rebreathing and that  $\Delta C_{aCO_2}$  is proportional to changes in arterial carbon dioxide pressure ( $P_{aCO_2}$ ) and end-tidal CO<sub>2</sub> pressure (PET<sub>CO<sub>2</sub></sub>), the following equation can be plotted:

$$CO = \Delta \dot{V}_{CO_2} / S \times \Delta PET_{CO_2}, \quad (3)$$

where  $\Delta PET_{CO_2}$  is the change in PET<sub>CO<sub>2</sub></sub> between normal breathing and CO<sub>2</sub> rebreathing, and S is the slope of the CO<sub>2</sub> dissociation curve from hemoglobin. The constant S can be expressed as a function of hemoglobin concentration and  $P_{aCO_2}$  as follows<sup>3</sup>:

$$S = (1.34 \times [Hb] + 18.34) / (1 + 0.193 \times P_{aCO_2})$$

$$[\text{ml CO}_2 \cdot \text{l}^{-1} \text{ blood} \cdot \text{mmHg}^{-1}], \quad (4)$$

where [Hb] is hemoglobin concentration.

Before the start of the study protocol, the NICO<sub>2</sub> system was calibrated for zero CO<sub>2</sub> by opening the system to the atmosphere, according to the manufacturer's instructions. We entered the results of arterial oxygen pressure ( $P_{aO_2}$ ),  $P_{aCO_2}$ ,  $F_{IO_2}$  (0.4–0.7), and hemoglobin concentrations (7.9–11.9 g/dl) into the machine when each patient was under the baseline ventilation. Inclusion of these parameters is used to calculate shunt fraction ( $P_{aO_2}$  and  $F_{IO_2}$ ), alveolar dead space ( $P_{aCO_2}$ ), and the slope of the CO<sub>2</sub> dissociation curve (hemoglobin).<sup>3,4</sup>

### Study Protocol

We used Bird 8400STi ventilators (Bird Corp.). At the time of admission to the intensive care unit, initial ventilatory settings were as follows: synchronized intermittent mandatory ventilation mode; volume-controlled ventilation (VCV); inspired  $V_T$  of 10 ml/kg; decelerating flow pattern; respiratory rate of 10–12 breaths/min; and inspiratory time of 1.0 s. The  $F_{IO_2}$  was adjusted by attending physicians to maintain a  $P_{aO_2}$  greater than 100 mmHg. Baseline PEEP was set at 4 cm H<sub>2</sub>O in 23 patients; because of hypoxemia, the remaining 2 patients needed PEEP of 6 and 8 cm H<sub>2</sub>O, respectively. With the patients maintained in the supine position, sedated with continuous intravenous injection of propofol (2–3 mg · kg<sup>-1</sup> · h<sup>-1</sup>), and paralyzed with bolus administration of vecuronium bromide (4–8 mg), we started the measurement protocol.

In random order, we applied six ventilatory settings to all of the 25 patients, and then we applied three additional settings in a fixed order (table 2). To test the effects of ventilatory mode and  $V_T$ , we chose VCV with inspired  $V_T$  of 12 or 6 ml/kg and pressure-controlled ventilation (PCV) with the same  $V_T$  settings. The  $F_{IO_2}$  and respiratory rate were fixed identical to baseline. The PEEP was also fixed identical to the baseline measurement (4 cm H<sub>2</sub>O in 23 patients, 6 cm H<sub>2</sub>O in 1, and 8 cm H<sub>2</sub>O in 1). The inspiratory time was set to 1.0 s for both VCV and PCV. The level of pressure control was adjusted

**Table 2. Ventilatory Settings**

| Ventilatory mode              | VCV | VCV | PCV | PCV | VCV | VCV | VCV              | VCV               | PSV |
|-------------------------------|-----|-----|-----|-----|-----|-----|------------------|-------------------|-----|
| Inspired tidal volume (ml/kg) | 12  | 6   | 12  | 6   | 12  | 12  | 12               | 12                | 8.8 |
| F <sub>IO<sub>2</sub></sub>   | 0.5 | 0.5 | 0.5 | 0.5 | 1.0 | 0.5 | 0.5              | 0.5               | 0.5 |
| PEEP*                         | 4   | 4   | 4   | 4   | 4   | 15  | 4                | 4                 | 4   |
| Rebreathing loop              | †   | †   | †   | †   | †   | †   | Long<br>(400 ml) | Short<br>(150 ml) | †   |
| No. of patients               | 25  | 25  | 25  | 25  | 25  | 25  | 17               | 17                | 23  |

Median values are presented for fraction of inspired oxygen (F<sub>IO<sub>2</sub></sub>) and positive end-expiratory pressure (PEEP).

VCV = volume-controlled ventilation; PCV = pressure-controlled ventilation; PSV = pressure-support ventilation.

\* In two patients, PEEP of 6 and 8 cm H<sub>2</sub>O was used because of hypoxemia. † The rebreathing loop was sized according to the manufacturer's instructions recommended for set tidal volume of 12 ml/kg.

to obtain the same V<sub>T</sub> during VCV. The rebreathing loop was sized according to the manufacturer's instructions recommended for a set V<sub>T</sub> of 12 ml/kg. To examine the effects of F<sub>IO<sub>2</sub></sub>, we increased the F<sub>IO<sub>2</sub></sub> to 1.0 with VCV and 12 ml/kg V<sub>T</sub>. To examine the effects of high PEEP, we increased PEEP to 12–15 cm H<sub>2</sub>O with VCV and 12 ml/kg V<sub>T</sub>, depending on the patient's hemodynamic stability. The order of these six conditions was randomized. Then, to examine the effects of varying the length of the rebreathing loop, in 17 patients, measurements were performed with the loop maximally expanded (400 ml) or fully retracted (150 ml) while VCV and 12 ml/kg V<sub>T</sub> were used. After the measurements were completed,

vecuronium infusion was stopped. When the patient recovered stable spontaneous breathing, we switched the ventilatory mode to continuous positive airway pressure of 4 cm H<sub>2</sub>O plus pressure-support ventilation (PSV) of 10 cm H<sub>2</sub>O.

After establishing steady-state conditions (approximately 15 min) at each setting, we measured both CO<sub>NI</sub> and CO<sub>TD</sub>. We limited ourselves perform only nine measurements (one measurement for each ventilatory setting) per patient. Arterial blood samples were analyzed with a calibrated blood gas analyzer (ABL 505; Radiometer, Copenhagen, Denmark). Hemodynamic data were also recorded. V<sub>D</sub>/V<sub>T</sub> and venous admixture fraction

**Table 3. Respiratory and Hemodynamic Parameters at Each Ventilatory Setting**

| Ventilatory Setting                                            | VCV<br>Large V <sub>T</sub> | VCV<br>Small V <sub>T</sub> | PCV<br>Large V <sub>T</sub> | PCV<br>Small V <sub>T</sub> | VCV<br>F <sub>IO<sub>2</sub></sub> 1.0 | VCV<br>High PEEP | VCV<br>Long Loop | VCV<br>Short Loop | PSV         |
|----------------------------------------------------------------|-----------------------------|-----------------------------|-----------------------------|-----------------------------|----------------------------------------|------------------|------------------|-------------------|-------------|
| V <sub>T</sub> (ml/kg)                                         | 13.0 ± 0.6                  | 6.9 ± 0.9*                  | 13.2 ± 0.8                  | 6.9 ± 0.9*                  | 12.9 ± 0.7                             | 13.2 ± 0.7       | 13.1 ± 0.8       | 13.1 ± 0.8        | 8.8 ± 2.6†  |
| V <sub>E</sub> (l · min <sup>-1</sup> · kg <sup>-1</sup> )     | 0.13 ± 0.01                 | 0.07 ± 0.02*                | 0.13 ± 0.01                 | 0.07 ± 0.02*                | 0.13 ± 0.01                            | 0.13 ± 0.01      | 0.13 ± 0.01      | 0.13 ± 0.01       | 0.14 ± 0.04 |
| PIP (cm H <sub>2</sub> O)                                      | 27.5 ± 5.8                  | 17.0 ± 3.5                  | 27.0 ± 6.4                  | 16.4 ± 3.9                  | 27.2 ± 5.8                             | 36.6 ± 7.1       | 26.9 ± 7.1       | 26.9 ± 7.0        | 15.2 ± 2.7  |
| PEEP (cm H <sub>2</sub> O)                                     | 4.2 ± 0.9                   | 4.2 ± 0.9                   | 4.2 ± 0.9                   | 4.2 ± 0.9                   | 4.2 ± 0.9                              | 14.0 ± 1.7       | 4.4 ± 1.1        | 4.4 ± 1.1         | 4.1 ± 0.4   |
| pH                                                             | 7.45 ± 0.04                 | 7.32 ± 0.04*                | 7.44 ± 0.05                 | 7.31 ± 0.03*                | 7.42 ± 0.04                            | 7.44 ± 0.05      | 7.42 ± 0.05      | 7.45 ± 0.04       | 7.39 ± 0.05 |
| Paco <sub>2</sub> (mmHg)                                       | 37.7 ± 5.4                  | 55.2 ± 6.8*                 | 39.2 ± 6.4                  | 56.1 ± 6.4*                 | 40.4 ± 6.4                             | 38.8 ± 7.5       | 40.5 ± 7.8       | 36.6 ± 7.1        | 43.6 ± 5.9  |
| P/F                                                            | 292 ± 87                    | 239 ± 69                    | 299 ± 88                    | 238 ± 58                    | 376 ± 87‡                              | 357 ± 113‡       | 324 ± 95         | 330 ± 94          | 275 ± 87    |
| Lactate (mm)                                                   | 2.0 ± 1.2                   | 1.9 ± 1.2                   | 2.1 ± 1.2                   | 1.9 ± 1.1                   | 1.9 ± 1.1                              | 2.0 ± 1.0        | 2.0 ± 0.9        | 2.1 ± 1.0         | 2.1 ± 1.2   |
| CO <sub>TD</sub> (l/min)                                       | 5.24 ± 1.45                 | 5.69 ± 1.58                 | 5.23 ± 1.56                 | 5.87 ± 1.79                 | 5.10 ± 1.50                            | 4.46 ± 1.45      | 5.34 ± 1.67      | 5.19 ± 1.33       | 5.43 ± 1.40 |
| CO <sub>NI</sub> (l/min)                                       | 5.41 ± 1.36                 | 4.02 ± 1.00§                | 5.60 ± 1.40                 | 4.23 ± 1.36                 | 5.30 ± 1.45                            | 4.82 ± 1.24      | 5.81 ± 1.58      | 6.49 ± 1.58       | 5.95 ± 1.38 |
| V̇CO <sub>2</sub> (ml · min <sup>-1</sup> · kg <sup>-1</sup> ) | 3.0 ± 0.3                   | 2.0 ± 0.4*                  | 3.1 ± 0.5                   | 2.2 ± 0.5*                  | 3.1 ± 0.4                              | 3.0 ± 0.4        | 3.2 ± 0.5        | 3.0 ± 0.5         | 3.2 ± 0.9   |
| PETco <sub>2</sub> (mmHg)                                      | 34.5 ± 3.8                  | 49.9 ± 6.8*                 | 35.4 ± 4.9                  | 50.4 ± 6.1*                 | 35.7 ± 4.7                             | 34.7 ± 4.9       | 36.7 ± 5.3       | 34.6 ± 4.8        | 42.4 ± 7.4# |
| V <sub>D</sub> /V <sub>T</sub>                                 | 0.43 ± 0.09                 | 0.50 ± 0.10**               | 0.43 ± 0.10                 | 0.45 ± 0.13                 | 0.45 ± 0.09                            | 0.43 ± 0.09      | 0.43 ± 0.11      | 0.41 ± 0.12       | 0.53 ± 0.17 |
| Q̇ <sub>s</sub> /Q̇ <sub>t</sub>                               | 0.05 ± 0.03                 | 0.10 ± 0.07                 | 0.06 ± 0.04                 | 0.10 ± 0.04                 | 0.03 ± 0.03                            | 0.04 ± 0.03      | 0.05 ± 0.04      | 0.06 ± 0.03       | 0.07 ± 0.05 |
| HR (beats/min)                                                 | 92 ± 7                      | 95 ± 9                      | 93 ± 8                      | 95 ± 9                      | 94 ± 8                                 | 92 ± 9           | 92 ± 9           | 91 ± 8            | 94 ± 8      |
| BP (mmHg)                                                      | 79 ± 9                      | 77 ± 10                     | 77 ± 10                     | 77 ± 12                     | 79 ± 11                                | 74 ± 11          | 76 ± 8           | 77 ± 9            | 79 ± 11     |
| PA (mmHg)                                                      | 19.3 ± 5.6                  | 25.3 ± 7.8                  | 18.6 ± 5.5                  | 24.6 ± 5.8                  | 19.0 ± 6.1                             | 21.3 ± 5.5       | 20.2 ± 6.6       | 19.6 ± 6.0        | 20.1 ± 5.7  |
| CVP (mmHg)                                                     | 7.9 ± 2.5                   | 9.6 ± 3.5                   | 7.5 ± 2.7                   | 9.4 ± 3.3                   | 7.6 ± 2.6                              | 10.4 ± 2.4††     | 7.6 ± 2.9        | 7.7 ± 2.3         | 8.6 ± 3.0   |
| PCWP (mmHg)                                                    | 9.8 ± 2.2                   | 11.5 ± 3.9                  | 9.6 ± 2.5                   | 11.8 ± 2.8                  | 10.1 ± 2.5                             | 11.8 ± 2.1       | 10.2 ± 2.8       | 10.0 ± 2.5        | 10.4 ± 3.8  |
| PVR (dyn · s · cm <sup>-5</sup> )                              | 158 ± 89                    | 212 ± 120                   | 153 ± 100                   | 194 ± 111                   | 149 ± 93                               | 185 ± 105        | 167 ± 108        | 161 ± 102         | 157 ± 84    |
| SVR (dyn · s · cm <sup>-5</sup> )                              | 1,162 ± 372                 | 997 ± 243                   | 1,145 ± 379                 | 974 ± 216                   | 1,191 ± 315                            | 1,237 ± 405      | 1,106 ± 335      | 1,126 ± 302       | 1,101 ± 320 |
| SvO <sub>2</sub> (%)                                           | 72 ± 7                      | 73 ± 7                      | 73 ± 7                      | 73 ± 7                      | 79 ± 6‡‡                               | 70 ± 8           | 73 ± 7           | 72 ± 6            | 72 ± 7      |

\*  $P < 0.05$  versus volume-controlled ventilation (VCV)–large tidal volume (V<sub>T</sub>), pressure-controlled ventilation (PCV)–large V<sub>T</sub>, fraction of inspired oxygen (F<sub>IO<sub>2</sub></sub>) 1.0, high positive end-expiratory pressure (PEEP), long loop, short loop, and pressure-support ventilation (PSV). †  $P < 0.05$  versus other ventilatory settings. ‡  $P < 0.05$  versus VCV–small V<sub>T</sub>, PCV–small V<sub>T</sub>, and PSV. §  $P < 0.05$  versus VCV–large V<sub>T</sub>, PCV–large V<sub>T</sub>, F<sub>IO<sub>2</sub></sub> 1.0, long loop, short loop, and PSV. ||  $P < 0.05$  versus PCV–large V<sub>T</sub>, long loop, short loop, and PSV. #  $P < 0.05$  versus VCV–large V<sub>T</sub>, VCV–small V<sub>T</sub>, PCV–large V<sub>T</sub>, PCV–small V<sub>T</sub>, F<sub>IO<sub>2</sub></sub> 1.0, high PEEP, and short loop. \*\*  $P < 0.05$  versus VCV–large V<sub>T</sub> and short loop. ††  $P < 0.05$  versus PCV–large V<sub>T</sub> and F<sub>IO<sub>2</sub></sub> 1.0. ‡‡  $P < 0.05$  versus VCV–large V<sub>T</sub>, PCV–large V<sub>T</sub>, high PEEP, and PSV.

V̇<sub>E</sub> = minute ventilation; PIP = peak inspiratory pressure; Paco<sub>2</sub> = arterial carbon dioxide tension; P/F = ratio of arterial oxygen tension to F<sub>IO<sub>2</sub></sub>; CO<sub>TD</sub> = cardiac output with thermodilution; CO<sub>NI</sub> = cardiac output with carbon dioxide rebreathing; V̇CO<sub>2</sub> = carbon dioxide production; PETco<sub>2</sub> = end-tidal carbon dioxide pressure; V<sub>D</sub>/V<sub>T</sub> = dead-space fraction; Q̇<sub>s</sub>/Q̇<sub>t</sub> = venous admixture fraction; HR = heart rate; BP = mean artery pressure; PA = mean pulmonary artery pressure; CVP = central venous pressure; PCWP = pulmonary capillary wedge pressure; PVR = pulmonary vascular resistance; SVR = systemic vascular resistance; SvO<sub>2</sub> = mixed venous oxygen saturation.

**Table 4. Results of Bland-Altman Analysis and Regression Analysis**

| Ventilatory Setting            | VCV<br>Large V <sub>T</sub> | VCV<br>Small V <sub>T</sub> | PCV<br>Large V <sub>T</sub> | PCV<br>Small V <sub>T</sub> | VCV<br>Fio <sub>2</sub> 1.0 | VCV<br>High<br>PEEP | VCV<br>Long<br>Loop | VCV<br>Short<br>Loop | PSV               |
|--------------------------------|-----------------------------|-----------------------------|-----------------------------|-----------------------------|-----------------------------|---------------------|---------------------|----------------------|-------------------|
| Bias (l/min)                   | 0.18                        | -1.67                       | 0.37                        | -1.64                       | 0.19                        | 0.37                | 0.48                | 1.30                 | 0.52              |
| Precision (l/min)              | 1.04                        | 1.06                        | 1.17                        | 1.19                        | 1.12                        | 0.81                | 1.27                | 1.15                 | 1.02              |
| Limits of agreement<br>(l/min) | -1.90 to<br>+2.26           | -3.79 to<br>+0.45           | -1.97 to<br>+2.71           | -4.02 to<br>+0.74           | -2.05 to<br>+2.43           | -1.25 to<br>+1.99   | -2.06 to<br>+3.02   | -1.00 to<br>+3.60    | -1.52 to<br>+2.56 |
| Slope of linear<br>regression  | 1.01                        | 0.69                        | 1.04                        | 0.71                        | 1.01                        | 1.05                | 1.05                | 1.23                 | 1.07              |
| Correlation<br>coefficient (R) | 0.63                        | 0.66                        | 0.50                        | 0.72                        | 0.62                        | 0.72                | 0.54                | 0.61                 | 0.63              |

VCV = volume-controlled ventilation; PCV = pressure-controlled ventilation; PSV = pressure-support ventilation; V<sub>T</sub> = tidal volume; Fio<sub>2</sub> = fraction of inspired oxygen; PEEP = positive end-expiratory pressure.

( $\dot{Q}_S/\dot{Q}_T$ ) were calculated using the following equations<sup>10,11</sup>:

$$V_D/V_T = 1 - (0.863 \cdot \dot{V}_{CO_2})/(\dot{V}_E \cdot PaCO_2) \quad (5)$$

and

$$\dot{Q}_S/\dot{Q}_T = (Cc'o_2 - CaO_2)/(Cc'o_2 - C\bar{v}O_2), \quad (6)$$

where  $\dot{V}_E$  is minute ventilation,  $Cc'o_2$  is oxygen content at the pulmonary capillary,  $CaO_2$  is arterial oxygen content, and  $C\bar{v}O_2$  is mixed venous blood oxygen content. Assuming that pulmonary capillary blood is fully saturated with oxygen and that oxygen content is roughly proportional to oxygen saturation, the second equation can be revised as follows:

$$\dot{Q}_S/\dot{Q}_T = (1 - SaO_2)/(1 - S\bar{v}O_2), \quad (7)$$

where  $SaO_2$  and  $S\bar{v}O_2$  are oxygen saturation at the artery and mixed venous blood, respectively.

#### Statistical Analysis

Data are presented as mean  $\pm$  SD. Using analysis of variance with repeated measures, mean values were compared across different settings. When significance

was observed, the mean values were tested by multiple comparison with the Bonferroni correction. We evaluated the correlation between  $CO_{NI}$  and  $CO_{TD}$  with linear regression and Bland-Altman analysis.<sup>12,13</sup> To investigate which parameters contributed to the discrepancy between  $CO_{NI}$  and  $CO_{TD}$ , we also performed linear multiple regression analysis among Fio<sub>2</sub>, V<sub>T</sub>, V<sub>E</sub>, PEEP, peak inspiratory pressure, pH, PaO<sub>2</sub>, PaCO<sub>2</sub>, PETCO<sub>2</sub>,  $\dot{V}_{CO_2}$ , and  $S\bar{v}O_2$ . Statistical significance was set at  $P < 0.05$ .

#### Results

Blood gas and hemodynamic results are summarized in table 3. Minute ventilation was stable at all 12-ml/kg V<sub>T</sub> settings. Regardless of ventilatory mode, the 6-ml/kg V<sub>T</sub> settings resulted in higher PaCO<sub>2</sub>, higher PETCO<sub>2</sub>, and less  $\dot{V}_{CO_2}$ , compared with the 12-ml/kg V<sub>T</sub> settings. During PSV, V<sub>T</sub> values ( $8.8 \pm 2.6$  ml/kg) decreased to between those for 12- and 6-ml/kg V<sub>T</sub> settings, whereas minute ventilation was similar to that at the 12-ml/kg V<sub>T</sub> settings.  $CO_{TD}$  values were similar at each 12-ml/kg V<sub>T</sub> setting, although  $CO_{TD}$  values at the 6-ml/kg V<sub>T</sub> settings were slightly larger in comparison. At high PEEP,  $CO_{TD}$  values were lower.

**Fig. 1.** Agreement between cardiac output measurements obtained by carbon dioxide rebreathing ( $CO_{NI}$ ) and those obtained by the thermodilution technique ( $CO_{TD}$ ). (A) Large tidal volumes (V<sub>T</sub>, 12 ml/kg) during both volume-controlled ventilation and pressure-controlled ventilation. (B) Same modes, but with small tidal volumes (6 ml/kg). Equations and result curves for linear regression analysis are also shown.

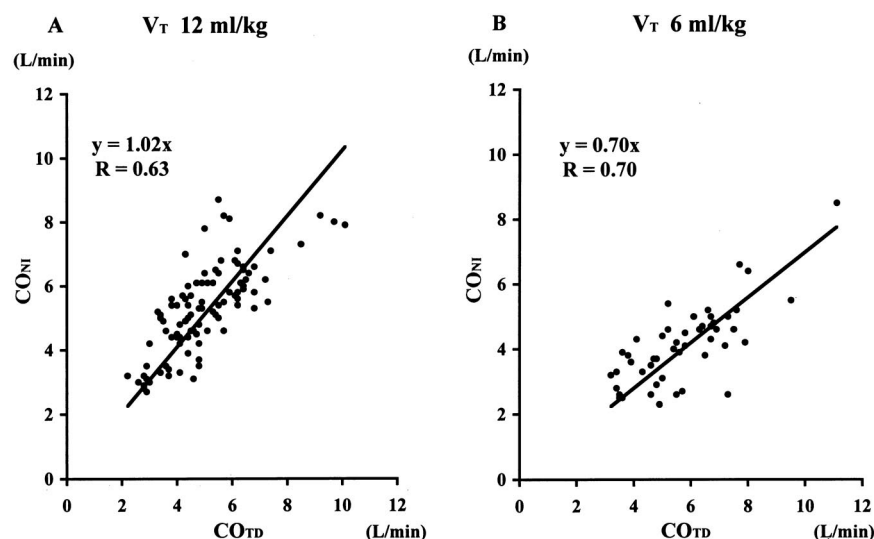



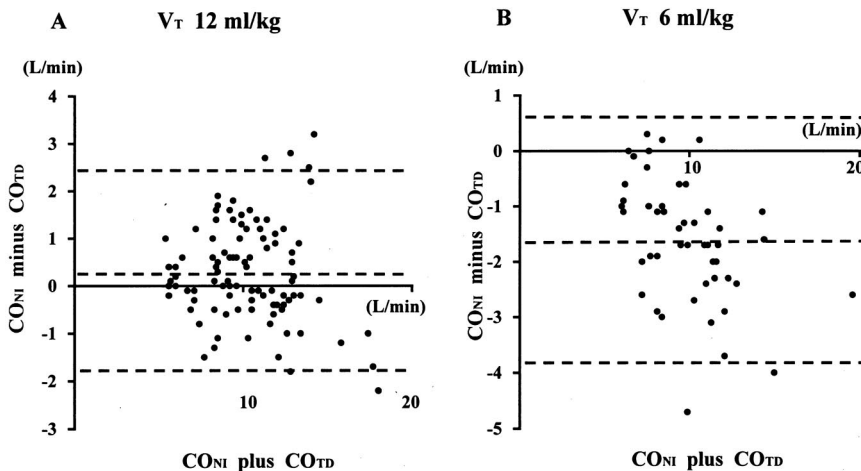

Fig. 2. Bias analysis between cardiac output measurements obtained by carbon dioxide rebreathing ( $\text{CO}_{\text{NI}}$ ) and one those obtained by thermodilution technique ( $\text{CO}_{\text{TD}}$ ). (A) Large tidal volumes ( $V_T$ ; 12 ml/kg) during both volume-controlled ventilation and pressure-controlled ventilation. (B) Same modes, but with small tidal volumes (6 ml/kg). Dotted lines show bias and limits of agreement between the two methods.

Levels of pressure control were  $24 \pm 7$  (16–36) cm  $\text{H}_2\text{O}$  with inspired  $V_T$  of 12 ml/kg and  $13 \pm 4$  (8–22) cm  $\text{H}_2\text{O}$  with  $V_T$  of 6 ml/kg. As a result, there was no difference in peak inspiratory pressure for VCV and PCV at either  $V_T$  setting (table 3).

Results of Bland-Altman analysis and linear regression analysis are shown in table 4 for each ventilatory setting. When  $V_T$  values were the same, Bland-Altman analysis characteristics between  $\text{CO}_{\text{TD}}$  and  $\text{CO}_{\text{NI}}$  were almost identical (bias and precision: 12-ml/kg  $V_T$  VCV, 0.18 and 1.04; 12-ml/kg  $V_T$  PCV, 0.37 and 1.17; 6-ml/kg  $V_T$  VCV, -1.67 and 1.06; and 6-ml/kg  $V_T$  PCV, -1.64 and 1.19, table 4). Consequently, for the same  $V_T$  values, CO data during both VCV and PCV were analyzed together.

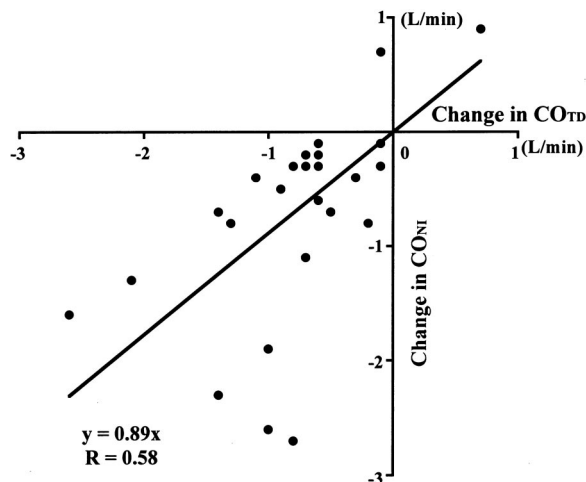

Fig. 3. Relation between changes in cardiac output measurements obtained by thermodilution technique and those obtained by carbon dioxide rebreathing when positive end-expiratory pressure was increased. Ventilatory settings are volume-controlled and 12 ml/kg tidal volume. When positive end-expiratory pressure was increased from 4.2 to 14.0 cm  $\text{H}_2\text{O}$  in average, cardiac output measurements obtained both by thermodilution technique and by carbon dioxide rebreathing decreased in almost all patients. Each point corresponds to a different patient. Note that both values moved in identical directions in all patients but one. Equations and result curves for linear regression analysis are also shown.

When  $V_T$  was 12 ml/kg, a fair correlation was observed between  $\text{CO}_{\text{NI}}$  and  $\text{CO}_{\text{TD}}$  (fig. 1). The slope of linear regression was 1.02 ( $R = 0.63$ , fig. 1), and bias was small (0.28 l/min, fig. 2), although limits of agreement were wide (-1.78 to +2.34 l/min, fig. 2). This is the case with ventilatory setting of high  $\text{FiO}_2$  or high PEEP (table 4). By contrast, when  $V_T$  was small (6 ml/kg), the  $\text{CO}_{\text{NI}}$  underestimated the  $\text{CO}_{\text{TD}}$  with a slope of 0.70 (fig. 1), a bias of -1.66 l/min, and limits of agreement of -3.9 to +0.58 l/min (fig. 2). During PSV, the correlation between  $\text{CO}_{\text{NI}}$  and  $\text{CO}_{\text{TD}}$  was also close to identical (slope = 1.07,  $R = 0.63$ , bias = 0.52 l/min, table 4). With the loop maximally expanded, the  $\text{CO}_{\text{NI}}$  correlated moderately with  $\text{CO}_{\text{TD}}$  (slope = 1.05, bias = 0.48, table 4); however, with the loop fully retracted,  $\text{CO}_{\text{NI}}$  overestimated  $\text{CO}_{\text{TD}}$  (slope = 1.23, bias = 1.30, table 4). Linear multiple regression analysis revealed that the setting most affecting the discrepancy between  $\text{CO}_{\text{NI}}$  and  $\text{CO}_{\text{TD}}$  was minute ventilation ( $R = 0.616$ ).

Figure 3 shows a relation between changes in  $\text{CO}_{\text{TD}}$  and those in  $\text{CO}_{\text{NI}}$  when PEEP was increased during VCV and 12-ml/kg  $V_T$ . When average PEEP was increased from 4.2 to 14.0 cm  $\text{H}_2\text{O}$ , both  $\text{CO}_{\text{TD}}$  and  $\text{CO}_{\text{NI}}$  decreased. Both values moved in identical directions in all patients but one. The value of CVP increased from  $7.9 \pm 2.5$  to  $10.4 \pm 2.4$  mmHg at higher PEEP, and pulmonary capillary wedge pressure also increased from  $9.8 \pm 2.2$  to  $11.8 \pm 2.1$  mmHg (table 3).

## Discussion

The main findings of this study are as follows. (1) During mechanical ventilation with large constant  $V_T$  or during PSV, CO measurements obtained by  $\text{CO}_2$  rebreathing technique correlate with those obtained by thermodilution method. (2) When minute ventilation is large, the accuracy of the  $\text{CO}_2$  rebreathing technique is not affected by a selection of VCV, PCV, spontaneous breathing (PSV), PEEP, or  $\text{FiO}_2$ . (3) When  $V_T$  and minute ventilation are reduced, the  $\text{CO}_2$  rebreathing technique

underreports CO. (4) CO measurements are accurate when the rebreathing loop is maximally expanded but is overestimated when the loop is fully retracted.

#### *Clinical Implications*

Using partial CO<sub>2</sub> rebreathing, CO can be measured noninvasively.<sup>3,4</sup> However, there have been few clinical reports, on the accuracy of this technique.<sup>5-7</sup> We need to confirm that it provides effective monitoring for critically ill patients and discover parameters that might affect accuracy. Our results suggest that at a large  $V_T$  setting and with constant minute ventilation, CO measurements obtained from this technology correlate fairly with those from the thermodilution method. When inspired  $V_T$  is set at 12 ml/kg and respiratory rate is set at 10–12 breaths/min, which results in an actual minute ventilation of  $0.13\text{--}0.14\text{ l} \cdot \text{min}^{-1} \cdot \text{kg}^{-1}$ , the linear regression slopes for CO<sub>NI</sub> and CO<sub>TD</sub> were almost identical (1.01:1.05). Bias analysis also indicated small bias and moderate precision (fig. 2), while accuracy was consistent regardless of ventilatory mode (VCV or PCV), PEEP, or FIO<sub>2</sub>. Correlation of results from CO<sub>NI</sub> and CO<sub>TD</sub> was also satisfactory during PSV (table 4). These observations suggest that this CO<sub>2</sub> rebreathing technique is reliable both with large constant  $V_T$  and during PSV. In addition, because the maximally expanded loop did not affect accuracy (table 4), rather than it being necessary to strictly adjust the loops, there may be some leeway in adjusting them for the maximal expected  $V_T$ . In contrast, when the rebreathing loop was set too short for a given  $V_T$ , CO<sub>NI</sub> measurements had greater values than those obtained by CO<sub>TD</sub> (table 4). This may be due to the small changes in PETCO<sub>2</sub> that occur with the shortest loop during CO<sub>2</sub> rebreathing, when a slight amount of noise would likely generate large errors.

To our surprise, when  $V_T$  was small (6 ml/kg), CO<sub>NI</sub> measurements showed consistently lower values than those produced by CO<sub>TD</sub>, resulting in a linear regression slope of 0.70 and a negative value of bias (figs. 1 and 2). Low  $V_T$  (6 ml/kg) is currently recommended for ventilator management in acute respiratory failure,<sup>14</sup> so attention needs to be drawn to the lack of reliable measurement using CO<sub>NI</sub> at the low  $V_T$  setting. Reasons for these discrepant results have not been clarified, but there are several possible explanations.

First, after we adjusted the length of rebreathing loops for high  $V_T$ , when  $V_T$  was decreased, results may have been affected because the loop had become relatively too long. However, we found that the maximally expanded loop did not make CO<sub>NI</sub> measurements less accurate (table 4). This finding suggests that the combination of long loop and small  $V_T$  are unlikely to impair the accuracy of CO<sub>NI</sub>.

Second, at small  $V_T$  settings, PETCO<sub>2</sub> increased to almost 60 mmHg in several patients. The software (version 3.1) that we used suspends rebreathing when the base-

line PETCO<sub>2</sub> is greater than 65 mmHg or PETCO<sub>2</sub> is greater than 80 mmHg during CO<sub>2</sub> rebreathing. It could be that the linearity between Caco<sub>2</sub> and PETCO<sub>2</sub> is less accurate when PETCO<sub>2</sub> is extremely high.

Finally, the assumed constancy of mixed venous CO<sub>2</sub> content may be false for some time after  $V_T$  and minute ventilation are changed. The measured values of  $\dot{V}_{CO_2}$  were smaller at low  $V_T$  than at high  $V_T$  (table 3). Although we waited for 15 min, this may not have been enough time for CO<sub>2</sub> stores to reach a steady state, which is 100 times larger than oxygen stores.<sup>9</sup> In addition, the time course of the increase in Paco<sub>2</sub> after abrupt decrease of ventilation is much slower than the rate of decrease after abrupt increase of ventilation.<sup>9</sup> These facts suggest that CO<sub>2</sub> stores and mixed venous CO<sub>2</sub> content may continue to change even after Paco<sub>2</sub> and PETCO<sub>2</sub> seem to have reached plateau values. If this is the case, the accuracy of the CO<sub>2</sub> rebreathing technique may be compromised when there are abrupt changes in minute ventilation and  $\dot{V}_{CO_2}$ . Further study is needed to find out exactly what happens after these sudden changes and whether these mechanisms affect the accuracy of the CO<sub>2</sub> rebreathing technique.

#### *Limitations*

The current study has several limitations. First, the patients in our study were sedated and paralyzed initially, resulting in constant  $V_T$  and stable  $\dot{V}_{CO_2}$ . Even during PSV, they breathed quietly with small variation in  $V_T$ . Therefore, our results may not be directly extrapolated to populations of patients whose  $V_T$  and  $\dot{V}_{CO_2}$  are changing.<sup>6</sup> Secondly, our patients had relatively normal lung mechanics (respiratory system compliance,  $45.4 \pm 12.8\text{ ml/cm H}_2\text{O}$ ; resistance,  $11.2 \pm 4.1\text{ cm H}_2\text{O} \cdot \text{s} \cdot \text{l}^{-1}$ ), and their hemodynamics had been stabilized at time of entry into the study. In more seriously compromised patients, the accuracy may be quite different. To corroborate the relevance of our findings for acutely ill and ventilator-dependent patients, it is prudent to perform further studies. Third, we did not examine how the ventilatory pattern alterations affect the assumptions underlying the fundamental equation of the NICO<sub>2</sub> technique: *e.g.*, constant  $V_D/V_T$ , constant CO, and constant mixed venous CO<sub>2</sub> content during the CO<sub>2</sub> rebreathing procedure. Finally, it remains to be clarified whether the impaired accuracy of CO<sub>NI</sub> with small  $V_T$  results from small  $V_T$  itself or from reduced minute ventilation. During PSV, when  $V_T$  was smaller ( $8.8 \pm 2.6\text{ ml/kg}$ ) but minute ventilation was similar to that at the high  $V_T$  settings, CO<sub>NI</sub> and CO<sub>TD</sub> values correlated fairly ( $y = 1.07x$ ); we speculate that if normocapnia is sustained by adjusting the respiratory rate, the accuracy of the CO<sub>NI</sub> technique can be maintained at small  $V_T$ .

In conclusion, noninvasive measurement of CO using CO<sub>2</sub> rebreathing is reliable with a bias of less than 0.5 l/min and a precision of 1 l/min when the tidal

volume is large and constant, regardless of ventilatory modes. However, at small tidal volume, the rebreathing system underreports CO, compared with the conventional thermodilution technique.

## References

1. Gattinoni L, Brazzi L, Pelosi P, Latini R, Tognoni G, Pesenti A, Fumagalli R, For the SvO<sub>2</sub> Collaborative Group: A trial of goal-oriented hemodynamic therapy in critically ill patients. *N Engl J Med* 1995; 333:1025-32
2. Connors AF, Speroff T, Dawson NV, Thomas C, Harrell FE, Wagner D, Desbiens N, Goldman L, Wu AW, Califf RM, Fulkerson WJ, Vidaillet H, Broste S, Bellamy P, Lynn J, Knaus WA: The effectiveness of right heart catheterization in the initial care of critically ill patients. *JAMA* 1996; 276:889-97
3. Capek JM, Roy RJ: Noninvasive measurement of cardiac output using partial CO<sub>2</sub> rebreathing. *IEEE Trans Biomed Eng* 1988; 35:653-61
4. Haryadi DG, Orr JA, Kuck K, McJames S, Westenskow DR: Partial CO<sub>2</sub> rebreathing indirect Fick technique for non-invasive measurement of cardiac output. *J Clin Monit* 2000; 16:361-74
5. Loeb RG, Brown EA, DiNardo JA, Orr JA, Watt RC: Clinical accuracy of a new non-invasive cardiac output monitor (abstract). *ANESTHESIOLOGY* 1999; 91:A474
6. Guzzi L, Drake N, Haryadi DG, Kuck K, Orr JA: Clinical evaluation of NICO<sub>2</sub> in ICU patients (abstract). *ANESTHESIOLOGY* 2000; 93:A328
7. Botero M, Khansarinia S, Kirby D, Gravenstein N, Lobato EB: Measurement of cardiac output in the intensive care unit (ICU) after coronary artery bypass grafting (CABG): Comparison of pulmonary artery catheter and noninvasive partial CO<sub>2</sub> rebreathing (NICO<sub>2</sub>) (abstract). *ANESTHESIOLOGY* 2000; 93:A590
8. Magder S: Cardiac output, Principles and Practice of Intensive Care Monitoring. Edited by Tobin MJ. New York, McGraw-Hill, 1998, pp 797-810
9. Nunn JF: Carbon dioxide, Nunn's Applied Respiratory Physiology, 4th edition. Edited by Nunn JF. Oxford, Butterworth-Heinemann, 1993, pp 219-46
10. Hess DR, Kacmarek RM: Physiologic effects of mechanical ventilation, Essentials of Mechanical Ventilation. Edited by Hess DR, Kacmarek RM. New York, McGraw-Hill, 1996, pp 3-10
11. Nunn JF: Distribution of pulmonary ventilation and perfusion, Nunn's Applied Respiratory Physiology, 4th edition. Edited by Nunn JF. Oxford, Butterworth-Heinemann, 1993, pp 156-97
12. Bland JM, Altman DG: Statistical methods for assessing agreement between two methods of clinical measurement. *Lancet* 1986; 1:307-10
13. Bland JM, Altman DG: Comparing methods of measurement: Why plotting difference against standard method is misleading. *Lancet* 1995; 346:1085-7
14. The Acute Respiratory Distress Syndrome Network: Ventilation with lower tidal volumes as compared with traditional tidal volumes for acute lung injury and the acute respiratory distress syndrome. *N Engl J Med* 2000; 342:1301-8
